# Supplementary material for: Epigenetic analysis of Paget’s disease of bone identifies differentially methylated loci that predict disease status
Source: eLife journal article supplement (doi:10.7554/elife.65715), 2021-04-30
Supplement: supp [file elife_poa_e65715_Figure_2_figure_supplement_1.docx]

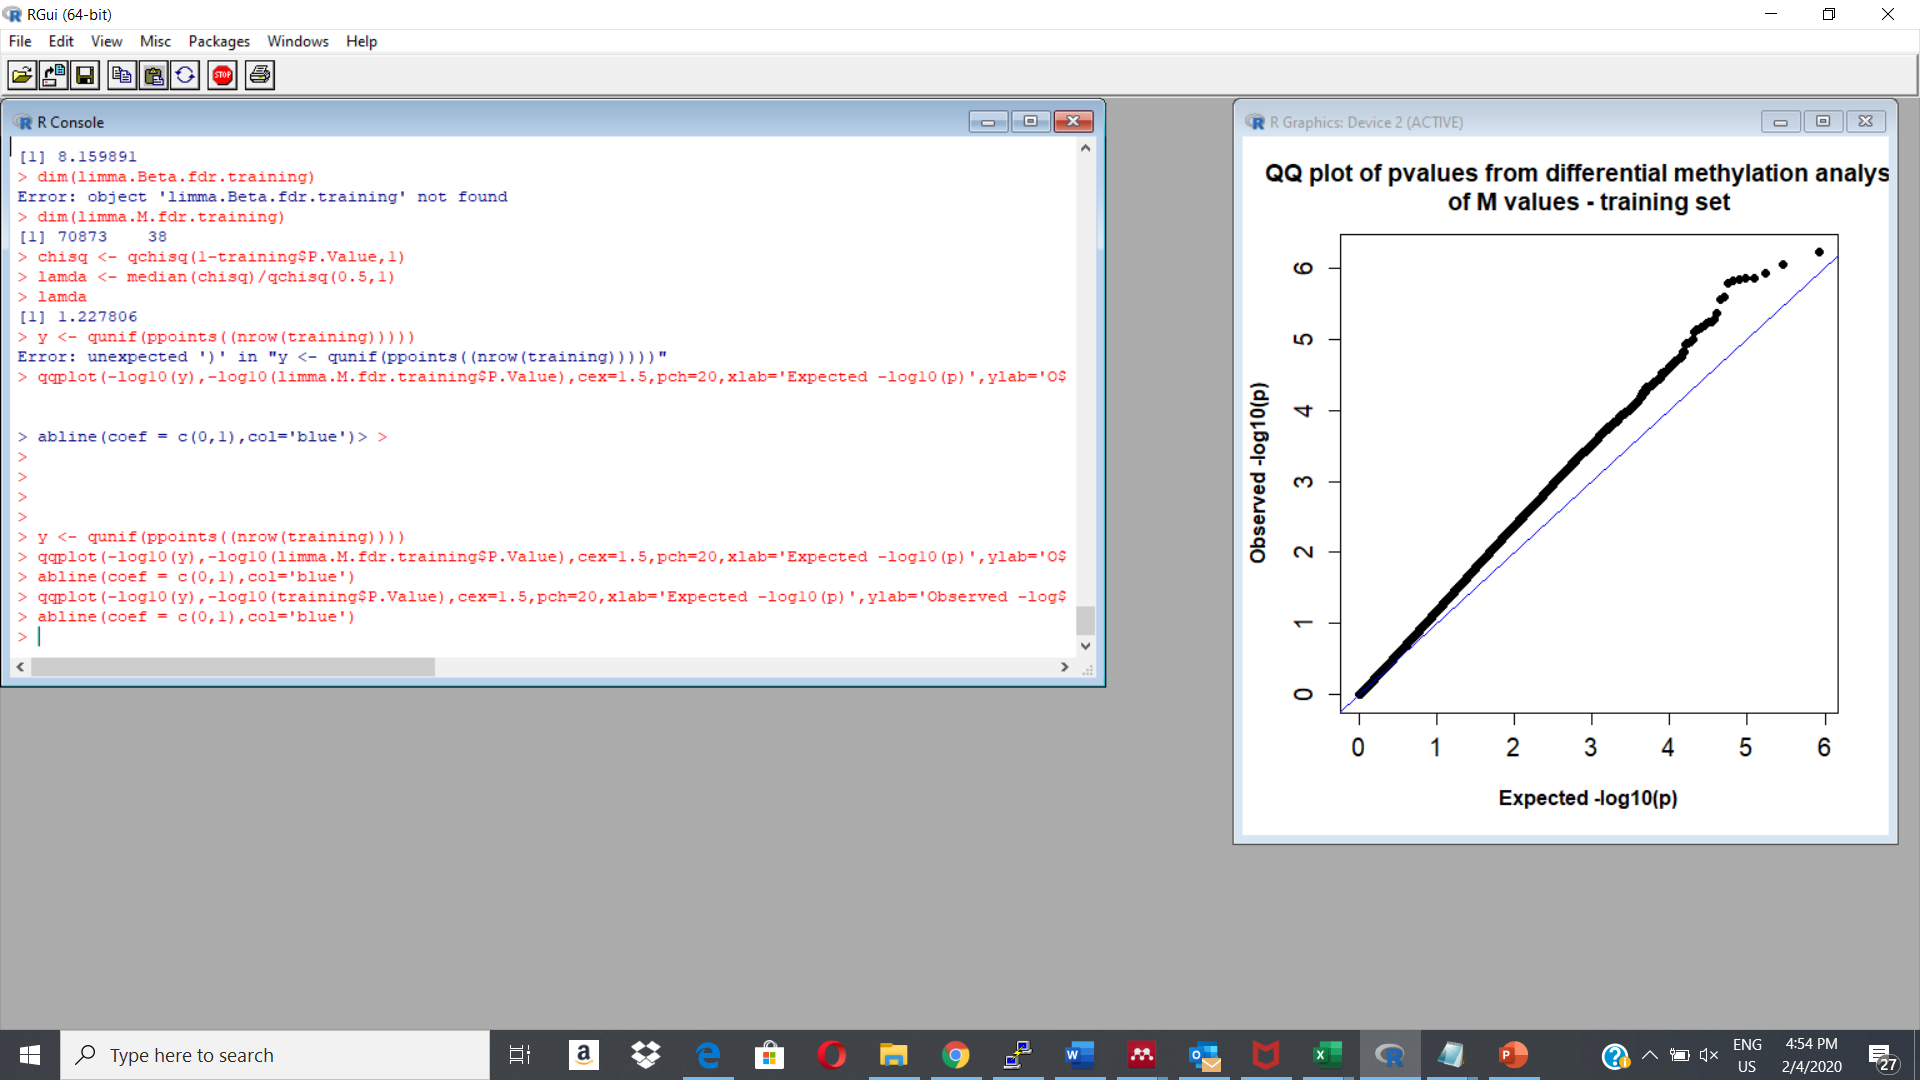


**Supplementary Figure S1: QQ plots of expected versus observed –log10 p-values from site differential methylation analysis. λ is the genomic inflation factor**

λ = 1.23
