# Supplementary material for: Epigenetic analysis of Paget’s disease of bone identifies differentially methylated loci that predict disease status
Source: eLife. 2021 Apr 30;10:e65715. doi: 10.7554/eLife.65715 (PMC8184208; doi:10.7554/eLife.65715)
Supplement: Supplementary file 1. [file elife-65715-supp1.xlsx]

## Sheet: DMS
Site	Discovery			Cross-validation			Annotation
cgid	𝝙Beta	P-Value	FDR	𝝙Beta	P-Value	FDR	Chr	Gene
cg10290814	-0.0181909	1.20229e-06	0.0145694	-0.0152574	0.000139959	0.00837753	chr17	TNK1
cg04317962	-0.0169345	1.40217e-06	0.0145694	-0.0185682	0.00287411	0.0308783	chr16	-
cg03885399	-0.0201907	4.43753e-06	0.0263075	-0.0143681	0.00358047	0.0338692	chr1	TAL1
cg19361865	-0.0144455	5.42881e-06	0.0263075	-0.0121759	9.74869e-05	0.00837753	chr1	MOSC2
cg09152582	-0.0205272	2.15428e-05	0.0406499	-0.0177284	3.48545e-05	0.00730201	chr1	-
cg11229533	-0.00731204	3.765e-05	0.0406499	-0.00274842	0.00568531	0.0425383	chr2	TMEM178
cg04738965	-0.0369352	3.95997e-05	0.0406499	-0.0283315	0.000711898	0.0190835	chr3	ZIC1
cg24773676	-0.00773749	4.33914e-05	0.0406499	-0.0061386	0.00462119	0.0395159	chr11	FGF3
cg09260089	-0.0240313	4.58448e-05	0.0406499	-0.0237802	0.000123671	0.00837753	chr10	NKX6-2
cg12080751	-0.0052067	4.59906e-05	0.0406499	-0.00334934	0.00394685	0.0359506	chr14	FLRT2
cg05404010	-0.00941398	4.7558e-05	0.0406499	-0.0104939	0.00213231	0.0283508	chr16	SALL1
cg09156233	-0.0145196	4.77028e-05	0.0406499	-0.00782108	0.00196957	0.0275083	chr4	BMPR1B
cg24879273	-0.0260382	4.91186e-05	0.0406499	-0.0155509	0.000167311	0.00876292	chr10	FLJ41350;LBX1
cg21858485	-0.0141895	5.88918e-05	0.0437135	-0.00609196	0.00139574	0.0243673	chr3	-
cg11536474	-0.0215575	5.99517e-05	0.0439301	-0.01883	0.00348031	0.0338692	chr2	-
cg15856599	-0.0132163	6.51539e-05	0.0464464	-0.00679712	0.00517867	0.0420899	chr14	-
cg05236677	-0.0228433	7.31346e-05	0.047516	-0.0142474	0.00236821	0.0283508	chr8	-
cg23497016	-0.00940247	8.37716e-05	0.047516	-0.0111386	0.00232506	0.0283508	chr2	MEIS1
cg04608900	-0.00886559	0.000103835	0.047516	-0.00899466	0.00341531	0.0338692	chr2	VAX2
cg17285225	-0.0165728	0.000124998	0.0475398	-0.0124986	0.00561308	0.0425383	chr3	OXTR
cg10964367	-0.0251991	0.000127186	0.0475398	-0.0192235	0.000385433	0.0139247	chr8	ARHGEF10
cg00097146	-0.0234476	0.000141158	0.0475398	-0.020296	0.00329149	0.0338692	chr2	SIX3
cg13649056	-0.0272474	0.000143613	0.0475398	-0.0231802	0.00157085	0.0263274	chr9	-
cg14531560	-0.00444156	0.000148976	0.0475398	-0.00318746	0.00363751	0.0338692	chr1	FBLIM1
cg25698089	-0.00239703	0.00015055	0.0475398	-0.00287977	0.000678349	0.0190835	chr15	MTFMT
cg13084458	-0.0159787	0.000153006	0.0475398	-0.00983708	0.0028304	0.0308783	chr4	INTU
cg00505277	-0.0110252	0.000157934	0.0475398	-0.00619884	0.00472914	0.0396302	chr19	-
cg23057648	-0.0345771	0.000158506	0.0475398	-0.0247109	0.000914846	0.0208116	chr21	C21orf88
cg14686555	-0.0122621	0.000161115	0.0475398	-0.00690311	0.00274574	0.0308783	chr2	LOC400940
cg21619775	-0.000502582	0.00016517	0.0475398	0.000986094	0.00413343	0.0368491	chr6	KCNK5
cg10321120	-0.00290919	0.000172426	0.0475511	-0.00263928	0.00564705	0.0425383	chr1	PANK4
cg16288089	-0.035903	0.000174658	0.0475511	-0.0257538	0.00173373	0.0269027	chr7	TAC1
cg01429039	-0.0229798	0.000178404	0.0475511	-0.0195837	0.000106188	0.00837753	chr4	SPATA18
cg16816603	-0.0240752	0.000184458	0.0475511	-0.020774	0.00123045	0.0237934	chr22	PHF21B
cg16419235	-0.0357354	0.000189998	0.0475511	-0.0289573	8.26615e-05	0.00837753	chr8	PENK
cg04654530	-0.0205457	0.000192446	0.0475511	-0.0141931	0.00460443	0.0395159	chr2	OTX1
cg04392469	-0.0234754	0.000192748	0.0475511	-0.0134076	0.00172569	0.0269027	chr1	MOSC2
cg11831981	-0.0190579	0.0001935	0.0475511	-0.00811742	0.00188236	0.0271968	chr15	SCG3
cg12995800	-0.0157455	0.000193557	0.0475511	-0.0175869	0.000774271	0.0190835	chr5	GLRA1
cg10954182	-0.0160544	0.000193611	0.0475511	-0.00895053	0.000206149	0.00959738	chr12	NFYB
cg22635008	-0.0154527	0.00020278	0.0478381	-0.00878416	0.0017978	0.0269027	chr10	OGDHL
cg22746058	-0.0399826	0.000203711	0.0478381	-0.0272255	0.000943725	0.0208116	chr10	PTF1A
cg10989763	-0.0247587	0.00020461	0.0478381	-0.0243954	0.000398798	0.0139247	chr2	NXPH2
cg21117668	-0.0154136	0.000206022	0.0479621	-0.0108334	0.00522357	0.0420899	chr2	BOK;BOK
cg08414087	-0.00888524	0.00021281	0.0484896	-0.00896337	0.000769768	0.0190835	chr10	-
cg06012215	-0.0344601	0.000228712	0.0484896	-0.0275271	0.00226683	0.0283508	chr10	-
cg12818103	-0.0335962	0.000230852	0.0486005	-0.0197145	0.00124929	0.0237934	chr14	C14orf109;MOAP1
cg12739454	-0.0181528	0.000239718	0.0494073	-0.0123873	0.000241031	0.0100992	chr1	-
cg00945293	-0.00564281	0.000249368	0.0494703	-0.0037134	0.00566655	0.0425383	chr1	FLJ42875;PRDM16
cg07095995	-0.0179153	0.000252669	0.0494703	-0.0154776	0.00350127	0.0338692	chr4	COL25A1
cg02653557	-0.0124394	0.000254105	0.0494703	-0.00783942	0.00133923	0.0243673	chr19	ZIK1
cg03839709	-0.0142846	0.000267542	0.0494703	-0.014153	3.45291e-05	0.00730201	chr13	HS6ST3
cg02344833	-0.0240624	0.000269339	0.0494703	-0.0229282	0.00113268	0.0237297	chr19	ZSCAN1
cg11007759	-0.028906	0.000285469	0.0499894	-0.0233937	0.00280371	0.0308783	chr2	FAM84A
cg10180406	-0.0233923	0.000288317	0.0499894	-0.0168641	0.00065124	0.0190835	chr1	PTGS2
cg25775494	-0.0202141	0.000288693	0.0499894	-0.0116481	0.00230032	0.0283508	chr6	NR2E1
