# Supplementary material for: Epigenetic analysis of Paget’s disease of bone identifies differentially methylated loci that predict disease status
Source: eLife. 2021 Apr 30;10:e65715. doi: 10.7554/eLife.65715 (PMC8184208; doi:10.7554/eLife.65715)
Supplement: Supplementary file 2. [file elife-65715-supp2.xlsx]

## Sheet: DMR islands
island info		Discovery			Cross-validation			Annotations
Islands	#Sites	chisq	P-value	FDR	chisq	P-value	FDR	Gene name
chr6:31926489-31926940	59	132.121	1.59358e-07	0.000792878	100.471	0.000617437	0.0140431	SKIV2L;RDBP
chr10:131761169-131771696	49	118.689	1.02984e-07	0.000792878	84.6519	0.00117899	0.0226088	EBF3
chr11:69451136-69458596	49	117.72	1.3859e-07	0.000792878	81.6018	0.00237913	0.0316869	CCND1
chr6:31548436-31549277	53	119.111	5.41967e-07	0.00139286	100.88	8.11939e-05	0.00441153	LTB
chr11:16626053-16629180	27	74.1143	2.84925e-06	0.00348694	66.236	3.79725e-05	0.00221147	-
chr3:37034228-37035356	45	98.9001	6.43894e-06	0.00493506	76.5963	0.00229227	0.0316869	EPM2AIP1;MLH1
chr10:119293917-119297675	36	84.3474	9.38984e-06	0.00536264	70.7863	0.000473887	0.0115865	EMX2OS
chr12:121837380-121838396	15	48.4669	2.13763e-05	0.0091562	36.2635	0.0016194	0.0273521	RNF34
chr6:33290370-33291087	64	119.606	3.12186e-05	0.010029	138.429	2.09499e-07	0.000102445	DAXX
chr1:47690980-47691727	9	36.7833	2.87679e-05	0.010029	30.18	0.000408827	0.0111065	TAL1
chr12:132938326-132939235	13	44.2773	2.76054e-05	0.010029	31.2004	0.00315132	0.0371324	-
chr2:64067892-64068906	27	66.733	3.23898e-05	0.0101514	49.9596	0.00459996	0.0445422	UGP2
chr5:115420581-115421165	11	39.1382	5.01835e-05	0.0128972	31.887	0.000795222	0.0165474	COMMD10
chr5:2748368-2757024	54	103.73	5.54578e-05	0.0137045	99.8217	0.000149362	0.0060865	IRX2
chr2:80531367-80531719	11	38.8132	5.69877e-05	0.0138156	37.5811	9.20446e-05	0.00473787	CTNNA2;LRRTM1
chr20:22562736-22566104	10	35.7559	9.27037e-05	0.0175183	31.779	0.000435842	0.0115204	FOXA2
chr19:36705433-36706262	20	52.5128	9.58159e-05	0.017844	41.2769	0.00343182	0.03814	ZNF565;ZNF146
chr15:65321431-65321996	13	40.9258	9.79613e-05	0.0178961	31.4694	0.00287734	0.0343176	MTFMT
chr17:45918094-45918774	14	42.4811	0.00010367	0.0182487	46.48	2.33974e-05	0.0018946	SCRN2
chr7:1703861-1710517	32	70.3016	0.000108315	0.0186725	73.7952	3.79202e-05	0.00221147	-
chr1:171810467-171811325	16	45.6483	0.000110329	0.0187741	36.0386	0.00285798	0.0343176	DNM3
chr17:5389390-5390283	19	49.9298	0.000134216	0.0197107	38.9748	0.00445038	0.0439643	DERL2;MIS12
chr2:173099482-173100098	7	29.0351	0.000142573	0.0202437	21.3785	0.00324852	0.0377066	-
chr17:80989059-80989392	15	43.0795	0.000153037	0.0211712	35.1059	0.0023751	0.0316869	B3GNTL1
chr12:119418591-119418834	8	30.4265	0.00017765	0.0223804	28.4418	0.000397142	0.0110973	SRRM4
chr16:79623491-79623957	8	30.4544	0.000175636	0.0223804	21.8262	0.00524828	0.04711	MAF
chr4:122871412-122873182	18	47.2469	0.000194659	0.0232685	41.1541	0.00144957	0.0262534	TRPC3
chr17:41855634-41856346	12	37.2483	0.000203607	0.0235707	31.5704	0.00161138	0.0273521	DUSP3
chr19:13616752-13617267	17	45.4834	0.000206245	0.0236295	37.0474	0.00331571	0.0377066	CACNA1A
chr12:109124224-109125964	14	40.3419	0.000225606	0.023959	38.964	0.00036943	0.0106265	CORO1C
chr19:9473589-9474001	16	43.6007	0.000226776	0.0239841	44.3831	0.000172462	0.00674672	ZNF177
chr6:33359097-33359975	58	103.327	0.000233683	0.0243144	111.838	2.82009e-05	0.00197004	KIFC1
chr9:100615234-100617510	10	33.3981	0.000233436	0.0243144	37.9681	3.84407e-05	0.00221147	FOXE1
chr17:17183886-17184699	14	40.245	0.000233615	0.0243144	32.1878	0.00376685	0.0404833	COPS3
chr2:152954633-152955784	19	48.2396	0.000236848	0.0244457	45.4768	0.000587515	0.0136807	CACNB4
chr11:20690579-20691845	20	49.5919	0.000253295	0.0245151	51.2868	0.000144549	0.0060865	NELL1
chr7:5458503-5469256	42	81.4182	0.000253779	0.0245151	76.7235	0.000852055	0.0173606	TNRC18
chr1:145075483-145075845	8	29.6077	0.000247914	0.0245151	23.5523	0.00272304	0.0332892	PDE4DIP
chr1:165204501-165205507	16	43.2109	0.000259731	0.0246594	44.0587	0.000193242	0.00726887	LMX1A
chr21:15755371-15756086	15	41.5427	0.000264191	0.0246899	33.9794	0.0034281	0.03814	HSPA13
chr5:133702629-133702905	11	34.5727	0.000291374	0.0254893	26.7359	0.00503638	0.046293	CDKL3
chr12:117484305-117484627	15	41.2336	0.000294593	0.0255779	38.7261	0.000704082	0.0153021	TESC
chr6:12012543-12013379	20	49.0898	0.000298564	0.0256625	43.0122	0.00203676	0.0297307	HIVEP1
chr3:33138083-33138769	15	41.1292	0.000305602	0.0258354	32.9451	0.00477664	0.0449188	TMPPE;GLB1
chr18:45456484-45458024	15	41.0285	0.000316607	0.0260252	42.3037	0.000201798	0.00729674	SMAD2
chr13:41767827-41768762	10	32.6073	0.000317003	0.0260252	25.3186	0.00477324	0.0449188	KBTBD7
chr6:31619856-31620525	67	113.565	0.000333197	0.0262674	114.576	0.000265403	0.00837303	BAT3
chr10:102133021-102133557	12	35.7204	0.000359269	0.0271565	28.3583	0.00490148	0.0456538	C10orf75
chr2:63274475-63279430	55	97.5141	0.000363023	0.0273507	129.999	5.17881e-08	5.06488e-05	OTX1
chr2:71126720-71129209	37	73.0416	0.000374781	0.0274501	89.7795	2.79926e-06	0.000684419	VAX2
chr18:3448006-3452360	37	72.8354	0.000396308	0.0274501	74.6718	0.000239977	0.00782325	TGIF1
chr5:39721548-39721835	5	22.6403	0.00039542	0.0274501	18.2319	0.00266941	0.0330466	-
chr14:24682402-24682837	22	51.3622	0.000382621	0.0274501	44.2551	0.0032951	0.0377066	MDP1;CHMP4A
chr3:128205495-128212274	42	79.7242	0.000395713	0.0274501	69.2793	0.00506478	0.046293	GATA2
chr3:184045016-184045236	14	38.5692	0.000424996	0.0287149	33.2967	0.00261025	0.0327285	EIF4G1;SNORD66
chr11:2603220-2603469	12	35.2299	0.000430409	0.028806	31.375	0.0017265	0.0273521	KCNQ1
chr18:8659443-8659672	7	26.3062	0.000443981	0.0292572	29.3596	0.000124388	0.0055296	-
chr11:2923301-2923817	60	103.17	0.000448413	0.0293985	100.067	0.000903412	0.0176707	SLC22A18AS
chr6:1604606-1615866	45	83.1932	0.000461548	0.0296544	96.6598	1.22553e-05	0.00149822	FOXC1
chr18:49868377-49868759	34	68.1079	0.000459752	0.0296544	66.5698	0.000700441	0.0153021	DCC
chr1:87617153-87617417	8	28.0837	0.000458592	0.0296544	22.5642	0.00397122	0.0406783	LOC339524
chr4:7802191-7802440	13	36.318	0.000529514	0.0307638	29.9646	0.00476539	0.0449188	AFAP1
chr1:61548753-61549564	26	56.0325	0.000558947	0.0312281	47.995	0.00540954	0.0476624	NFIA
chr5:107005130-107008191	25	54.4873	0.000574267	0.0316031	54.8323	0.000517661	0.0123481	EFNA5
chr20:2780978-2781497	16	40.7928	0.000595736	0.032224	43.4424	0.000239634	0.00782325	CPXM1
chr15:29407695-29408229	14	37.4558	0.000629116	0.0324542	38.2987	0.000467686	0.0115865	APBA2
chr10:134218268-134219615	20	46.7758	0.000630114	0.0324542	42.4641	0.00240492	0.0316869	PWWP2B
chr1:10532177-10532800	13	35.7812	0.000641541	0.032698	30.7446	0.00367374	0.040165	DFFA
chr17:655026-656707	18	43.5611	0.000666307	0.0329309	45.4808	0.000353035	0.0104627	ELP2P;GEMIN4
chr17:57287355-57287792	9	28.5988	0.000757097	0.0343795	37.1072	2.51838e-05	0.0018946	C17orf71
chr3:147113608-147114479	12	33.4987	0.000808825	0.0356549	39.1074	0.000101029	0.00494033	ZIC4
chr19:8595086-8595471	3	16.6987	0.000815071	0.0358687	14.3809	0.00242997	0.0316869	MYO1F
chr6:28602853-28603295	51	88.7301	0.000836342	0.0365158	94.4358	0.000208905	0.00729674	-
chr9:115913081-115913807	9	28.1979	0.000883887	0.0369364	31.0567	0.000289476	0.00884711	SLC31A2
chr7:1269165-1282864	60	100.109	0.000894902	0.0369758	116.316	1.80408e-05	0.00172952	UNCX
chr5:59189046-59189894	16	39.6116	0.000886938	0.0369758	37.6143	0.00171712	0.0273521	PDE4D
chr1:2983925-2987962	30	60.1075	0.000893485	0.0369758	56.4993	0.00239152	0.0316869	FLJ42875;PRDM16
chr6:30457369-30458175	47	83.184	0.000894419	0.0369758	76.8681	0.00386986	0.0406783	HLA-E
chr11:2905023-2907024	31	61.4769	0.000900907	0.0369964	58.9249	0.00180304	0.0275527	CDKN1C
chr6:26225386-26225790	14	36.3739	0.000916992	0.0369964	34.1557	0.00195707	0.0294228	HIST1H3E
chr7:148844254-148845556	10	29.7815	0.000930036	0.0373468	28.1092	0.00173398	0.0273521	ZNF398
chr17:77770672-77778468	40	73.4157	0.000996519	0.0386283	71.1298	0.00176391	0.0273826	CBX8
chr12:14720248-14721093	15	37.5611	0.00104722	0.0391675	34.9911	0.00246622	0.0317364	PLBD1
chr7:96631383-96631800	14	36.0038	0.00104209	0.0391675	33.3687	0.00254831	0.0323669	DLX6AS
chr6:127835928-127836255	11	31.1069	0.00105928	0.0394542	27.0934	0.00444829	0.0439643	C6orf174
chr11:47615710-47616055	7	24.1286	0.00108156	0.0398141	23.074	0.00165478	0.0273521	C1QTNF4
chr1:23945941-23946295	6	22.2121	0.00110824	0.0400587	19.2105	0.00382252	0.040635	-
chr10:134597357-134602649	54	91.3998	0.00111376	0.0401587	85.5777	0.00399296	0.0406783	NKX6-2
chr21:34638515-34639075	14	35.7709	0.00112907	0.0402766	56.1644	5.45638e-07	0.000177878	IL10RB
chr6:33281112-33281827	55	92.4863	0.00116683	0.0408811	112.368	8.13875e-06	0.00132662	TAPBP
chr7:2107080-2107381	20	44.715	0.00120598	0.0417142	39.8004	0.00529377	0.04711	MAD1L1
chr2:171671598-171671804	7	23.8448	0.00121318	0.0418	22.6188	0.00198559	0.0294228	GAD1
chr3:23847871-23848633	13	33.9519	0.00122395	0.0418963	30.7265	0.00369616	0.040165	UBE2E1
chr5:41510324-41510651	3	15.8089	0.00124101	0.0424121	12.7136	0.00529867	0.04711	PLCXD3
chr11:128562671-128565011	27	54.6794	0.00125543	0.0426921	50.0227	0.00452346	0.0442395	FLI1
chr6:170584091-170584307	12	32.1165	0.00132763	0.0438107	33.2061	0.000898845	0.0176707	-
chr1:233463526-233464414	14	35.2658	0.00134255	0.0438107	33.8363	0.00217908	0.030886	KIAA1804
chr4:81257040-81257270	15	36.8074	0.00135009	0.0438107	33.5655	0.0039172	0.0406783	C4orf22
chr10:28030182-28035211	39	70.8076	0.0013718	0.0441273	71.3097	0.00120856	0.022643	MKX
chr5:123987398-123987748	10	28.6984	0.00139407	0.044451	35.1333	0.00011849	0.00551823	ZNF608
chr14:23770512-23771902	21	45.5875	0.00144931	0.0450389	58.7876	1.94526e-05	0.00172952	BCL2L2
chr1:2005179-2005565	31	59.6292	0.00149221	0.0454381	75.0916	1.59205e-05	0.00172952	PRKCZ
chr12:41086522-41087102	19	42.5268	0.00150388	0.0456613	41.4337	0.00211207	0.0303766	CNTN1
chr18:10525841-10526433	15	36.248	0.0016278	0.0472658	40.0277	0.000449144	0.0115596	NAPG
chr6:152128822-152129771	44	76.7047	0.00164148	0.0475604	95.8131	1.03236e-05	0.00144236	ESR1
chr1:200860076-200860576	15	36.1634	0.00167429	0.0479063	51.3011	7.36635e-06	0.00132662	C1orf106
chr15:101419261-101421133	24	49.251	0.00176146	0.0485313	52.1436	0.000749362	0.0159321	ALDH1A3
chr12:120650214-120650528	6	21.0808	0.0017743	0.0486135	21.4976	0.0014926	0.0265412	PXN
chr20:21086139-21087175	12	31.2595	0.00179819	0.0489303	28.793	0.00422843	0.042633	-
chr3:147126988-147128999	46	78.9136	0.0018078	0.0490218	79.1027	0.00172933	0.0273521	ZIC1
chr5:145725286-145725852	3	15.0068	0.00181082	0.049039	15.8328	0.00122707	0.022643	-
