# Supplementary material for: Epigenetic analysis of Paget’s disease of bone identifies differentially methylated loci that predict disease status
Source: eLife. 2021 Apr 30;10:e65715. doi: 10.7554/eLife.65715 (PMC8184208; doi:10.7554/eLife.65715)
Supplement: Supplementary file 3. [file elife-65715-supp3.xlsx]

## Sheet: DMR gene bodies
gene info		Discovery			Cross-validation
Gene name	# Sites	chisq	P-value	FDR	chisq	P-value	FDR
SDCCAG8	52	137.818	1.07133e-09	1.999e-05	109.715	5.23916e-06	0.000365
PRDM2	46	118.719	2.40584e-08	0.000141957	74.3684	0.00507539	0.0264088
CACNA1B	36	94.9779	3.25147e-07	0.000774137	65.2803	0.00200809	0.015413
TSNAX-DISC1	45	107.2	5.44784e-07	0.000924103	69.2882	0.0114996	0.0451871
CTNND2	43	102.525	9.04729e-07	0.00140678	67.5077	0.00989719	0.0414718
RBPMS	51	113.088	1.33203e-06	0.00159651	89.2974	0.000731399	0.00796132
DLX6AS	62	128.803	1.369e-06	0.00159651	92.3111	0.00752385	0.0345878
HSPA13	5	34.732	1.70181e-06	0.00176412	22.1991	0.00047987	0.00622516
PARD3B	52	113.076	2.02981e-06	0.00189371	93.1485	0.00039886	0.00539601
BRD1	34	85.6676	2.39868e-06	0.00202463	64.6169	0.00118257	0.0109793
MFHAS1	31	80.7279	2.61301e-06	0.00202463	51.5666	0.0116114	0.045438
GDF6	37	89.8803	2.71268e-06	0.00202463	62.619	0.00532327	0.0268146
ARL3	10	43.9551	3.3534e-06	0.00240487	24.4551	0.00647995	0.0308367
CNTNAP2	56	116.43	3.94917e-06	0.00245625	105.601	6.90396e-05	0.00192818
PWWP2B	42	95.9259	4.23049e-06	0.00254635	86.2159	6.9227e-05	0.00192818
GRTP1	34	83.7622	4.39306e-06	0.00256157	62.5729	0.00201818	0.015413
PRDM6	48	104.209	4.89116e-06	0.00274989	73.1565	0.0111347	0.0444654
TOP1MT	47	102.564	5.1747e-06	0.00274989	73.024	0.00886288	0.0381507
EXOC4	52	109.416	5.6958e-06	0.00274989	82.6063	0.0043997	0.0249663
ASPH	27	71.7902	6.20726e-06	0.00274989	62.7655	0.000113189	0.00282078
THBS2	48	102.503	7.94583e-06	0.00315151	88.8036	0.000311127	0.00491832
SOX5	43	94.8858	8.86283e-06	0.00315151	70.8711	0.00472017	0.0256897
MTMR6	11	43.2427	9.85366e-06	0.0033429	27.4195	0.0039697	0.0239446
SSH1	40	89.7443	1.10414e-05	0.00354252	71.0943	0.00177939	0.0143157
RECQL5	45	96.8594	1.15775e-05	0.0036004	81.2217	0.000755163	0.00812658
C6orf136	46	98.1087	1.22196e-05	0.00364414	72.2952	0.00794364	0.0357662
EMX2OS	60	117.48	1.33403e-05	0.00388932	107.666	0.000156019	0.00321196
EXD3	58	114.573	1.38355e-05	0.00397165	99.3309	0.000595436	0.00704847
CBS	35	81.4043	1.46e-05	0.00406598	63.8627	0.00204751	0.0155119
PRG3	2	22.1474	1.55147e-05	0.00409424	11.0927	0.00390162	0.0238047
ADAMTS9	32	76.4294	1.68426e-05	0.00423371	74.4971	3.05966e-05	0.00111442
STK19	51	104.023	1.70174e-05	0.00423371	89.6714	0.00066922	0.00754466
HLA-DPB2	61	117.796	1.7556e-05	0.00431022	109.47	0.000139171	0.00303844
PANX1	19	55.7079	1.80982e-05	0.00432942	39.2888	0.00405241	0.0240589
ASB7	11	41.6733	1.8447e-05	0.004357	30.6365	0.00125779	0.011344
NR5A2	58	113.073	2.04873e-05	0.00450363	97.2871	0.000946016	0.00952668
PEX14	50	101.918	2.05768e-05	0.00450363	94.8077	0.000134867	0.00303844
RGS20	30	72.5997	2.15958e-05	0.00463168	63.3691	0.000353242	0.00522688
ZFR2	51	102.705	2.43127e-05	0.00484402	89.0231	0.000780472	0.00830457
DYM	5	28.8634	2.46627e-05	0.00484402	19.0969	0.00184388	0.014431
PSMA1	19	54.7385	2.5487e-05	0.00495377	35.7241	0.0114094	0.0450197
AFF1	45	93.3754	3.08855e-05	0.00545682	69.7185	0.0105127	0.0430253
PCDHA13	42	89.0808	3.10195e-05	0.00545682	101.027	9.01263e-07	0.000121928
ELOVL6	20	55.6684	3.26059e-05	0.00545682	62.6399	2.75865e-06	0.000290271
RBM47	27	66.6981	3.27544e-05	0.00545682	50.0047	0.00454515	0.025469
BCL11A	58	110.291	4.19027e-05	0.00641381	99.7394	0.000542113	0.00658181
KIAA0146	35	77.8968	4.19131e-05	0.00641381	58.2987	0.0080068	0.0357662
LOC100130872-SPON2	48	96.4332	4.25321e-05	0.00642364	72.4887	0.0127436	0.0482728
ANKFY1	36	78.9949	4.6656e-05	0.00655375	81.5978	2.15738e-05	0.000851266
DPP10	43	88.9407	4.81463e-05	0.00655375	81.7334	0.000334764	0.00510933
C1orf9	11	39.2231	4.85422e-05	0.00655375	24.0501	0.0125234	0.0481731
HIPK2	61	113.726	4.91733e-05	0.00655375	99.6798	0.00130088	0.011622
CLMN	28	66.8702	5.03319e-05	0.00663895	48.1015	0.0104497	0.0430253
SYNJ2	62	114.789	5.278e-05	0.00679187	128.741	1.39264e-06	0.000164854
DCLK1	39	82.5244	5.88675e-05	0.00732272	87.2497	1.49503e-05	0.000745154
CARD11	69	123.646	5.95138e-05	0.00735409	102.818	0.00517152	0.0267405
HOXB6	30	69.1847	6.23721e-05	0.00746027	70.0817	4.73407e-05	0.00160113
NRG1	48	94.9433	6.34183e-05	0.00753708	102.89	7.12149e-06	0.00037467
SRGAP1	28	66.0956	6.41344e-05	0.00754191	51.4786	0.00440272	0.0249663
SPG7	63	115.324	6.43772e-05	0.00754191	108.941	0.000292564	0.00477687
MUC5B	55	104.48	6.49639e-05	0.00754191	83.4874	0.00790303	0.0357662
CLEC16A	59	109.9	6.50757e-05	0.00754191	104.401	0.000247887	0.00439711
MYO9B	40	83.5521	6.59445e-05	0.00759543	67.6775	0.00404411	0.0240589
UBE2I	42	86.3097	6.74514e-05	0.00762773	69.1144	0.00525769	0.0267405
CEP72	53	101.364	7.16978e-05	0.00791603	92.0846	0.000703824	0.00775025
TMEM181	30	68.5594	7.54942e-05	0.0082377	51.4603	0.00870275	0.0379793
BAT1	66	118.422	8.00168e-05	0.00863025	115.821	0.000147746	0.00310923
NRXN2	65	116.776	8.63503e-05	0.0091546	99.6552	0.00369191	0.0230176
WDR60	54	101.86	8.94918e-05	0.00927682	79.7376	0.0129476	0.0488501
UHRF1	41	83.7495	9.26618e-05	0.00929333	70.3336	0.00293795	0.0203083
ENOX1	51	97.5793	9.39502e-05	0.00929333	85.3547	0.00182275	0.0143846
METRNL	35	75.1163	9.46524e-05	0.00929333	65.777	0.00124804	0.011344
DNAH10	52	98.9058	9.49122e-05	0.00929333	92.1527	0.000507014	0.0064019
NEGR1	12	38.9447	0.000107465	0.0101513	47.4469	3.89995e-06	0.000365
PBX1	67	118.488	0.00010772	0.0101513	113.125	0.000367634	0.00535615
PAQR8	13	40.6302	0.00010938	0.0102065	29.9397	0.00480481	0.0258531
KBTBD7	5	25.5281	0.000110147	0.0102065	16.7678	0.00496185	0.026216
NELL1	25	59.8151	0.000110867	0.0102065	52.9045	0.000919619	0.00946607
LOC440839	66	116.713	0.000119923	0.0106554	101.124	0.00352496	0.022864
TAL1	17	46.995	0.000122126	0.0106983	46.6892	0.00013586	0.00303844
ORMDL1	10	35.0351	0.000123156	0.0107382	32.0264	0.000396404	0.00539601
KIF5C	45	88.1654	0.000127261	0.0108427	70.9074	0.00817532	0.0362993
TESC	36	75.3071	0.000135206	0.0112125	101.516	3.71318e-08	1.17213e-05
ARSG	35	73.7289	0.000141061	0.0115406	64.4237	0.00177328	0.0143157
ERBB2	29	64.9754	0.000142873	0.0115406	53.1327	0.00406486	0.0240589
RUNX2	49	93.1554	0.000145243	0.0116814	101.355	1.63067e-05	0.000772122
INSIG1	15	43.0516	0.000154571	0.0121183	39.069	0.000625814	0.00722738
TTYH3	50	94.1209	0.000160727	0.0123235	77.2466	0.00800204	0.0357662
ZNF670	6	26.6147	0.000170961	0.0125589	19.2093	0.00382432	0.0235171
FLT4	55	100.496	0.000176226	0.012745	98.6265	0.000277947	0.00461782
UST	54	98.8914	0.000188102	0.0132947	90.522	0.0013586	0.0118522
CLASP1	45	86.5533	0.00019461	0.013499	82.5831	0.000538132	0.00658181
TCF19	53	97.214	0.000204381	0.0139181	101.264	7.35633e-05	0.00199041
EGFL8	52	95.8548	0.00020517	0.0139209	87.9689	0.00134963	0.0118522
ZNF667	6	26.163	0.0002076	0.0139392	26.6458	0.000168684	0.00332799
ESRRG	57	102.401	0.000212245	0.0141439	141.295	4.14916e-09	3.87239e-06
PCDHAC1	31	66.536	0.000213789	0.0141961	70.8795	5.85659e-05	0.00178909
ANKS1B	56	101.014	0.000215184	0.0142056	87.871	0.00417356	0.0244529
TMEM159	12	37.0957	0.000215558	0.0142056	46.4593	5.78141e-06	0.000365
SATB2	35	72.1628	0.000219916	0.0143979	58.4723	0.00768722	0.0351681
PTGFRN	28	62.0175	0.00022358	0.0145358	73.1087	6.76799e-06	0.00037467
NTNG1	30	64.8923	0.000226417	0.0146692	59.3915	0.00109023	0.0103185
ESR1	29	63.1655	0.00024548	0.0154223	49.1515	0.0111295	0.0444654
CTDSPL	25	57.262	0.000246531	0.0154363	44.2904	0.0100616	0.0416085
TMCC1	17	44.8739	0.000254255	0.0156572	34.4434	0.00735562	0.0339794
COTL1	21	51.0344	0.00026144	0.0157556	42.0203	0.00418307	0.0244529
GREB1	47	88.1111	0.00026328	0.0157556	82.4669	0.00106266	0.0103185
AAK1	24	55.4679	0.000270639	0.0161337	42.6462	0.010913	0.0441652
KCNK13	11	34.7234	0.00027522	0.0163026	26.2455	0.00596548	0.028823
SRRM3	45	85.1697	0.000278723	0.0163806	69.7059	0.0105405	0.0430253
XKR4	41	79.6708	0.000279827	0.0163806	94.0844	4.71005e-06	0.000365
LTB	28	61.2648	0.000280053	0.0163806	47.4216	0.0123587	0.0477701
DNMT3A	56	99.7014	0.000295243	0.0168986	97.5202	0.000494735	0.00633128
PDSS2	14	39.4944	0.000305777	0.0173948	38.8033	0.000391135	0.00539601
TRIL	16	42.6851	0.000311642	0.017621	34.1356	0.00520892	0.0267405
AGPAT4	45	84.686	0.000315647	0.0177935	74.9774	0.00332829	0.021975
PMEPA1	32	66.5666	0.000320642	0.0179816	59.1476	0.00243496	0.0176023
HSPG2	57	100.642	0.000323261	0.0180591	116.158	6.2489e-06	0.000369857
NBEA	50	91.2386	0.000331355	0.0182311	128.336	8.17823e-09	3.87239e-06
BAT4	49	89.8754	0.00033317	0.0182311	79.7475	0.00359568	0.0230075
UBE3C	34	69.2468	0.000335059	0.0182311	55.6617	0.0109701	0.0442071
ASPSCR1	58	101.803	0.0003354	0.0182311	96.0439	0.00124705	0.011344
ZNF512	10	32.4594	0.000335605	0.0182311	25.4019	0.00463354	0.025601
TBC1D14	54	96.4873	0.000338066	0.0182311	93.5112	0.000684664	0.00762796
SGMS1	37	73.1461	0.000364308	0.0192567	75.046	0.000216403	0.00394102
LMX1A	37	72.8757	0.000392008	0.0203422	83.7536	1.7611e-05	0.000794173
CACNA2D3	60	103.749	0.000392475	0.0203422	91.5667	0.00539783	0.0270463
TAC1	7	26.5699	0.000398195	0.0205815	33.5373	2.1021e-05	0.000851266
BAALC	24	54.1493	0.00040713	0.020643	54.0574	0.000418799	0.00550838
ADRA2A	5	22.425	0.000434613	0.0211262	19.6494	0.0014539	0.012404
MERTK	11	33.4977	0.000436808	0.0211262	25.0319	0.00901925	0.0386481
WIPI2	49	88.6866	0.000447088	0.0213356	80.93	0.00276655	0.0194068
SERGEF	28	59.5948	0.00045871	0.0216129	48.7923	0.00879222	0.0380193
EBF2	38	73.6081	0.000466959	0.021837	79.5262	9.18409e-05	0.00241593
SLIT2	19	46.1254	0.000475778	0.0221055	37.0807	0.00775263	0.0352968
PSMB9	42	78.9662	0.000481477	0.0221055	95.5619	4.71495e-06	0.000365
MGC23284	27	57.9607	0.000485006	0.0221055	45.7523	0.0135263	0.049649
HRH2	17	42.951	0.0004881	0.0221055	36.1351	0.00439979	0.0249663
CEPT1	11	33.0445	0.000517491	0.0227998	24.8864	0.0094723	0.0400352
PRKCH	32	64.8697	0.000517935	0.0227998	61.1846	0.00142155	0.0122382
NUMA1	40	75.8822	0.000528513	0.0229325	65.9439	0.00603882	0.0290292
C6orf182	10	31.2685	0.000529713	0.0229325	22.3533	0.0134023	0.0495781
ADAMTS10	33	66.1664	0.000533836	0.0230575	57.2805	0.00547444	0.0271429
POU3F2	7	25.8326	0.000539564	0.0231975	29.0585	0.000141173	0.00303844
PRR4	34	67.4503	0.000550928	0.0234822	57.4189	0.00726162	0.0337516
ZCCHC14	66	109.984	0.000554202	0.0235555	98.8777	0.00545342	0.0271429
GTF2H4	61	103.514	0.0005573	0.0236333	110.06	0.000120764	0.00293241
DOCK2	46	83.7204	0.000566241	0.0239038	86.8791	0.000254877	0.00439711
MKX	26	55.9103	0.000579609	0.0241744	53.7733	0.00108408	0.0103185
ACOT7	66	109.72	0.000587263	0.0243505	109.478	0.00061923	0.00722738
ZIC4	39	74.0731	0.000593389	0.0244957	78.4068	0.00018588	0.00345154
PGD	8	27.4146	0.000599376	0.0246156	19.7864	0.011175	0.0444654
ERG	15	39.1409	0.000610506	0.0247768	34.132	0.00326294	0.0217606
VWA3B	33	65.592	0.000625585	0.0251569	60.5257	0.0024171	0.0176023
CNOT1	19	45.2703	0.000628122	0.0252046	42.8377	0.0013642	0.0118522
GPHN	15	39.013	0.000638003	0.0254317	29.6583	0.013215	0.0493679
MAST1	43	79.188	0.000642552	0.0254317	81.9017	0.000320433	0.00497459
SPATA13	40	75.1148	0.000645064	0.0254317	71.0143	0.0018147	0.0143846
GEM	6	23.4572	0.000656952	0.0254317	26.486	0.000180699	0.00345154
C21orf58	8	27.1602	0.000663318	0.0254969	21.499	0.0059337	0.0288165
CACNA1A	47	84.4134	0.000663327	0.0254969	90.7767	0.000132286	0.00303844
DOM3Z	46	83.0615	0.00066654	0.0254969	69.7526	0.0134743	0.049649
TMEM201	30	60.9978	0.000695933	0.0261276	49.697	0.0133316	0.04951
ZNF177	7	25.2041	0.000698086	0.0261558	25.93	0.000518386	0.00645936
CCHCR1	35	67.9135	0.000708037	0.0263173	60.266	0.00501066	0.026216
SHISA9	32	63.497	0.00075836	0.0273699	53.4699	0.0100378	0.0416085
MYO10	63	104.689	0.00076178	0.0273874	109.452	0.000260019	0.00439711
KIF13B	34	66.2346	0.000767001	0.0274411	58.0001	0.00631767	0.0302163
RPL4	11	31.8661	0.000801391	0.0281762	29.1771	0.00213065	0.0159362
HTT	42	76.9578	0.000803287	0.0281762	68.0728	0.00664272	0.0312968
L3MBTL3	22	48.8926	0.000825945	0.0286989	42.3197	0.00571651	0.02819
RDBP	40	74.1004	0.000837193	0.0289002	66.9032	0.00484374	0.0259154
NAV1	51	88.6689	0.000848474	0.0289898	88.3474	0.000915055	0.00946607
AKT3	28	57.4636	0.000849854	0.0289898	48.4947	0.00947371	0.0400352
EIF4E1B	8	26.5253	0.000853507	0.0290449	25.9437	0.00107384	0.0103185
GNAO1	49	85.8915	0.000879476	0.0293563	80.2265	0.00323514	0.0217282
CD200R1	4	18.742	0.000883178	0.0294272	14.0076	0.00727068	0.0337516
D2HGDH	41	75.1051	0.000913281	0.0301076	69.387	0.00367141	0.0230176
GPAM	10	29.809	0.000920484	0.0301851	31.9359	0.000410414	0.00547411
SHROOM3	56	94.774	0.000931496	0.0303778	109.092	2.81729e-05	0.00106719
ETV6	40	73.6758	0.000932873	0.0303778	82.2245	9.55932e-05	0.00244667
FZD3	8	26.2757	0.000942045	0.0306097	22.9571	0.00341974	0.0223345
COLEC11	54	92.1266	0.000943274	0.0306097	103.107	6.51e-05	0.00192655
CLSTN1	45	80.2641	0.000955329	0.03093	82.3973	0.000563769	0.00675809
TRIP10	20	45.4346	0.000963092	0.03093	43.4467	0.00178379	0.0143157
STK24	48	84.0171	0.00100478	0.0318306	81.1731	0.00195544	0.0151787
WRN	26	53.9121	0.0010414	0.0326216	52.4488	0.00158512	0.0131676
ATP9A	13	34.4127	0.00104145	0.0326216	31.9352	0.002456	0.0176199
C18orf2	1	10.7411	0.00104782	0.03264	6.95857	0.00834185	0.036743
SCRN2	6	22.2805	0.00107699	0.033161	16.0973	0.0132412	0.0493679
NR6A1	13	34.1785	0.00113065	0.0338089	34.6569	0.000955686	0.00952668
C16orf68	16	38.807	0.00115957	0.0342891	35.0425	0.00392136	0.0238047
RAI14	29	57.674	0.00119173	0.0347999	54.3177	0.00297365	0.0204061
SIX3	16	38.6314	0.00122903	0.0354992	36.405	0.00254114	0.0180937
SFMBT2	50	85.7292	0.00124325	0.0356889	98.4793	5.18115e-05	0.00163552
C5orf38	19	43.0934	0.00125873	0.0360413	47.1503	0.000339903	0.00510933
FAM176A	22	47.4796	0.00127031	0.0361289	39.7112	0.0116826	0.0455287
LRBA	42	75.0966	0.00127712	0.0361289	71.816	0.00281623	0.0196101
SDF4	38	69.6448	0.00131105	0.0367312	63.011	0.00656851	0.0311019
STAMBP	7	23.6148	0.0013312	0.0371182	18.9951	0.0082028	0.0362993
KCNH4	16	38.3441	0.00135136	0.037411	53.8132	5.5627e-06	0.000365
EIF4G1	31	59.9633	0.00136328	0.0375182	51.2337	0.0125647	0.0481731
CCR4	3	15.5515	0.00140113	0.0382778	12.8878	0.00488569	0.025993
DNM3	37	67.9543	0.00143146	0.0388493	58.8419	0.0126489	0.0482334
DPF3	42	74.5973	0.00144366	0.0388672	65.6419	0.0112873	0.044724
NRXN3	59	96.5799	0.00146673	0.0388672	91.0762	0.00464982	0.025601
ARHGEF7	58	95.3	0.00146834	0.0388672	97.7904	0.000844918	0.00889042
GRIN1	34	63.7838	0.00147296	0.0388739	54.91	0.0130353	0.048986
MTMR7	19	42.5507	0.00149264	0.0392682	36.1823	0.0100244	0.0416085
ELP2P	3	15.4151	0.00149421	0.0392682	12.5398	0.00574516	0.02819
RTKN	9	26.8112	0.00150297	0.0393833	21.4559	0.0107731	0.0437858
GFRA1	29	56.8318	0.00150492	0.0393833	52.1239	0.00528033	0.0267405
VSTM2A	18	41.0165	0.00151444	0.0394668	37.408	0.00463507	0.025601
SBF1	32	60.8538	0.00155296	0.040134	56.7281	0.00452327	0.025469
CDH11	30	58.0326	0.00158284	0.0404534	58.2044	0.00151049	0.0127717
BCL9L	14	34.779	0.00158484	0.0404534	32.8223	0.0030559	0.0208197
IKZF1	30	57.9438	0.00162151	0.04088	56.6953	0.00226969	0.016662
PITX1	25	50.8735	0.00166072	0.0413344	58.6437	0.000160358	0.00323104
CGREF1	6	21.2362	0.00166365	0.0413344	17.1509	0.00874454	0.0379866
STRN	7	22.9617	0.00173098	0.042413	17.8465	0.0126823	0.0482334
GRID1	52	86.7735	0.00176936	0.0430895	83.4246	0.00369448	0.0230176
MAPT	62	99.4603	0.00178698	0.0432703	130.878	7.73824e-07	0.000121928
RAP1GAP2	56	91.8107	0.00180275	0.0433473	126.75	2.11066e-07	3.9976e-05
TUBB	49	82.8151	0.00180537	0.0433544	79.4835	0.00381008	0.0235171
ERBB4	27	53.3699	0.00181551	0.043486	51.1515	0.0033415	0.021975
SPTBN4	52	86.5907	0.00184352	0.0438372	101.81	4.46676e-05	0.00156667
C15orf34	6	20.9861	0.00184519	0.0438372	18.9057	0.00432595	0.0249663
KIAA0922	26	51.814	0.00189734	0.0444754	51.3521	0.00216038	0.0159834
ADI1	19	41.7693	0.00190391	0.044501	39.07	0.00432599	0.0249663
GPR177	28	54.5822	0.00190797	0.044501	60.0877	0.000396908	0.00539601
C1orf159	55	90.2013	0.00193965	0.0449031	92.8345	0.00107851	0.0103185
C20orf166	42	73.3686	0.00194537	0.0449797	75.6987	0.00110049	0.0103185
PPM1J	8	24.3959	0.00196628	0.0452949	21.8366	0.00522774	0.0267405
SYTL2	16	37.1616	0.00198998	0.0456453	34.4288	0.00475419	0.025727
FAM150B	8	24.3103	0.0020326	0.0461286	20.252	0.00942348	0.0400352
MOSC2	7	22.4848	0.00209465	0.0467513	23.2474	0.00154342	0.0129347
HIVEP1	15	35.465	0.0021103	0.0469291	42.5535	0.000184642	0.00345154
ALDH1A3	14	33.9277	0.00211322	0.0469291	31.3256	0.00498993	0.026216
ITGAE	33	61.0349	0.00211853	0.0469291	74.2471	5.17784e-05	0.00163552
PNKD	34	62.3	0.00216509	0.0473223	60.2084	0.00367692	0.0230176
SIPA1	21	44.2532	0.00216791	0.0473223	42.9276	0.003211	0.0217201
CPT1A	48	80.7084	0.00217518	0.0473223	116.472	1.27714e-07	3.02363e-05
GOLT1B	7	22.3708	0.00219209	0.0474504	24.4963	0.000931611	0.0094864
TMEM204	42	72.8509	0.00220272	0.0474618	80.639	0.000311615	0.00491832
SNED1	51	84.4063	0.0022554	0.0477785	103.417	2.00578e-05	0.000851266
CCNF	21	44.1166	0.00225823	0.0477785	42.5677	0.00356773	0.0229839
ITPR3	38	67.4468	0.00227446	0.0479538	72.3111	0.000658113	0.00750883
LINGO2	3	14.4795	0.00232008	0.0484071	14.6544	0.00213717	0.0159362
CHST11	47	79.1316	0.00232194	0.0484071	73.9862	0.00723717	0.0337516
BCL11B	57	91.8512	0.00235192	0.0485844	87.4373	0.00587609	0.0286838
CSMD2	68	105.625	0.00235693	0.0485844	102.099	0.00470108	0.0256897
PDGFD	31	57.8839	0.00237707	0.0485844	52.399	0.00951205	0.0400352
EIF5	7	22.1561	0.00238769	0.0485844	23.03	0.00168424	0.0138693
INPP5F	16	36.5682	0.00241114	0.0489507	32.4691	0.00868313	0.0379793
EXOC2	63	99.2614	0.00242014	0.0489776	109.487	0.00025792	0.00439711
ST18	23	46.6661	0.00246937	0.0493335	40.8664	0.0122658	0.0476052
LRRC67	3	14.3431	0.0024735	0.0493335	14.2276	0.00261118	0.0184536
TJP1	16	36.4505	0.00250419	0.0494976	42.0995	0.000381335	0.00539601
