# Supplementary material for: Epigenetic analysis of Paget’s disease of bone identifies differentially methylated loci that predict disease status
Source: eLife. 2021 Apr 30;10:e65715. doi: 10.7554/eLife.65715 (PMC8184208; doi:10.7554/eLife.65715)
Supplement: Supplementary file 4. [file elife-65715-supp4.xlsx]

## Sheet: DMR promoters
promoter info		Discovery			Cross-validation
Gene Name	#sites	chisq	P-value	FDR	chisq	P-value	FDR
BDNF	57	113.932	1.13484e-05	0.0122387	114.268	1.03772e-05	0.00242826
CLEC14A	5	23.6147	0.000257431	0.0359515	24.9653	0.000141498	0.0124174
PROCR	6	25.5463	0.000270405	0.0368082	25.1639	0.000318394	0.0124174
CRTAC1	6	24.8113	0.000370034	0.0409792	25.9379	0.000228648	0.0124174
CALML4	5	22.5318	0.000414714	0.0428215	23.4439	0.00027759	0.0124174
CDKN1C	28	58.7244	0.000591152	0.0496794	62.4666	0.000195308	0.0124174
ALDH3A2	6	24.3635	0.000447649	0.0432101	24.3014	0.000459606	0.0153018
RASSF1	39	74.9512	0.000471066	0.0439632	74.5535	0.000523138	0.0153018
BRD2	44	96.1776	9.29315e-06	0.0116012	80.7854	0.000603034	0.0156789
SORCS3	11	34.5358	0.000295477	0.0373317	31.7969	0.000822113	0.0183643
POU4F3	9	30.5533	0.000353047	0.0403138	28.259	0.000863281	0.0183643
SMAD2	9	31.4133	0.000251382	0.0356191	27.168	0.001312	0.0236159
GEMIN4	14	39.1284	0.000348438	0.0402611	35.4675	0.001253	0.0236159
COMMD10	4	26.1596	2.9384e-05	0.0181973	17.4775	0.00156068	0.0260856
UBTF	26	64.7932	3.68205e-05	0.0183272	50.7068	0.00258641	0.0336234
ZNF613	8	33.6883	4.62627e-05	0.0188494	23.7896	0.00248551	0.0336234
DAOA	3	21.0104	0.000104755	0.0262088	14.5384	0.00225678	0.0336234
RPL26L1	13	37.6658	0.000325557	0.0385348	32.1024	0.00231976	0.0336234
CAPN5	8	30.5657	0.000167827	0.0307345	23.3774	0.00291209	0.0358647
BOLA3	10	34.3217	0.000162896	0.030634	26.4409	0.00319039	0.0373275
AADAT	9	32.3949	0.000170129	0.0308648	24.6562	0.00337592	0.0376174
GATA3	41	86.7381	4.01448e-05	0.0186563	68.9954	0.00402239	0.0427836
TGIF1	34	77.3201	3.20612e-05	0.0181973	59.4818	0.00440288	0.0447945
P2RY6	13	38.8657	0.00021005	0.0333105	29.9979	0.00471298	0.0459515
C1S	6	27.0993	0.000138734	0.0292729	18.5582	0.00497856	0.0465993
LCMT1	4	19.8839	0.000526449	0.0464654	14.7382	0.00527622	0.047486
APC	26	65.2468	3.17967e-05	0.0181973	47.8394	0.00563824	0.0488647
