# Supplementary material for: Epigenetic analysis of Paget’s disease of bone identifies differentially methylated loci that predict disease status
Source: eLife. 2021 Apr 30;10:e65715. doi: 10.7554/eLife.65715 (PMC8184208; doi:10.7554/eLife.65715)
Supplement: Supplementary file 5. [file elife-65715-supp5.xlsx]

## Sheet: Best subset sites
site	Chr	Position	Group	Gene Name
cg22579218	chr7	87848722	DMR-gene-bodies	SRI
cg15423853	chr12	11323943	DMR-gene-bodies	PRR4
cg17019285	chr8	11725104	DMS; DMR-gene-bodies	CTSB
cg20079734	chr12	124325907	DMR-gene-bodies	DNAH10
cg25629326	chr8	95274342	DMR-gene-bodies	GEM
cg01263077	chr19	17316300	DMR-gene-bodies	MYO9B
cg24879273	chr10	102989645	DMS	FLJ41350;LBX1
cg01012445	chr4	151504920	DMR-gene-bodies	LRBA;MAB21L2
cg18246368	chr19	1757699	DMR-gene-bodies	ONECUT3
cg24998981	chr18	77441810	DMR-gene-bodies	CTDP1
cg23025752	chr3	66433559	DMR-gene-bodies	LRIG1
cg18098714	chr6	32935404	DMR-promoters	BRD2
cg12423398	chr17	655593	DMR-promoters	ELP2P;GEMIN4
cg27093989	chr2	102314611	DMR-gene-bodies	MAP4K4
cg14928764	chr20	23064608	DMS; DMR-gene-bodies	CD93
cg09320746	chr13	44361019	DMR-gene-bodies	ENOX1
cg23667555	chr12	25403962	DMR-promoters	KRAS
cg11616777	chr5	1431115	DMR-gene-bodies	SLC6A3
cg02662604	chr16	1603505	DMR-gene-bodies	IFT140;TMEM204
cg16416806	chr6	32935897	DMR-promoters	BRD2
cg22334684	chr1	9666618	DMR-gene-bodies	TMEM201
cg14985606	chr2	37459046	DMR-gene-bodies	CEBPZ;C2orf56
cg01461840	chr10	130085088	DMS	-
cg06008873	chr8	25745763	DMR-gene-bodies	EBF2
cg25451660	chr11	11641324	DMR-gene-bodies	GALNTL4
cg19635158	chr1	27561056	DMR-islands; DMR-gene-bodies	WDTC1
cg22475339	chr1	1272415	DMR-islands; DMR-gene-bodies	DVL1
cg10459054	chr20	57413436	DMR-gene-bodies	GNASAS;GNAS
cg14940308	chr2	73144644	DMR-gene-bodies	EMX1;EMX1
cg22214335	chr1	20811408	DMR-islands; DMR-gene-bodies	CAMK2N1
cg00938540	chr20	61166085	DMR-gene-bodies	C20orf166
cg03373091	chr22	38902403	DMR-promoters	DDX17
cg20708892	chr3	146262746	DMR-promoters	PLSCR1
cg22865402	chr1	186344630	DMR-gene-bodies	C1orf27;TPR;MIR548F1
cg09462536	chr7	130132413	DMR-promoters	MEST;MESTIT1
cg00758533	chr17	656901	DMR-islands; DMR-gene-bodies; DMR-promoters	ELP2P;GEMIN4
cg02471512	chr16	21964152	DMR-promoters	UQCRC2
cg04699394	chr2	11775086	DMR-gene-bodies	GREB1
cg10841343	chr12	56211714	DMR-promoters	ORMDL2;SARNP
cg07889826	chr3	50127152	DMS	RBM5
cg25142947	chr5	140566303	DMR-promoters	PCDHB9
cg03134147	chr1	20209848	DMR-islands	OTUD3
cg23618156	chr2	86255217	DMR-gene-bodies	POLR1A
cg17181805	chr8	30408975	DMR-gene-bodies	RBPMS
cg15953187	chr11	1256378	DMR-gene-bodies	MUC5B
cg03045231	chr11	5811184	DMR-promoters	OR52N1
cg13056269	chr2	136633607	DMR-gene-bodies	MCM6
cg24701257	chr7	73097740	DMR-gene-bodies; DMR-promoters	WBSCR22;DNAJC30
cg08941714	chr12	49582874	DMS	TUBA1A
cg09499856	chr5	41510325	DMR-gene-bodies	PLCXD3
cg01493379	chr2	238264441	DMR-gene-bodies	COL6A3
cg27660248	chr4	1201315	DMR-gene-bodies	LOC100130872;LOC100130872-SPON2
cg01964358	chr5	140566767	DMR-promoters	PCDHB9
cg20695238	chr15	68499752	DMR-gene-bodies; DMR-promoters	CLN6;CALML4
cg15121288	chr11	67007855	DMR-gene-bodies	KDM2A
cg20541191	chr8	32504110	DMR-promoters	NRG1
cg01518659	chr12	53574337	DMR-gene-bodies; DMR-promoters	CSAD;ZNF740
cg20198948	chr17	42297002	DMR-promoters	UBTF
cg21614408	chr6	52228023	DMR-gene-bodies	PAQR8
cg24925901	chr13	111877445	DMR-gene-bodies	ARHGEF7
cg06353075	chr12	99029458	DMR-gene-bodies	IKBIP
cg10477653	chr6	31941629	DMR-gene-bodies	STK19
cg04241308	chr4	183838090	DMR-gene-bodies	DCTD;DCTD
cg21102477	chr1	34630844	DMR-gene-bodies	CSMD2
cg15586931	chr17	2798327	DMR-gene-bodies	RAP1GAP2
cg14583675	chr2	44058776	DMS	ABCG5
cg13401911	chr1	20812335	DMR-gene-bodies	CAMK2N1
cg14768256	chr3	44754587	DMR-gene-bodies	ZNF502
cg04724866	chr1	28504680	DMS	PTAFR
cg11220908	chr11	68541142	DMR-gene-bodies	CPT1A
cg13979602	chr6	31127004	DMR-gene-bodies	CCHCR1;TCF19
cg13973849	chr9	138657014	DMS	KCNT1
cg12486486	chr4	69179905	DMR-gene-bodies	YTHDC1
cg18502477	chr11	57946199	DMS	OR9Q1
cg23785882	chr18	32824104	DMR-gene-bodies	ZNF397
cg12630461	chr15	91500009	DMS	RCCD1
cg09202263	chr11	2398494	DMS	CD81
cg12368280	chr3	123747733	DMS	-
cg04954225	chr14	72490712	DMR-gene-bodies	RGS6
cg03978169	chr6	33091357	DMR-gene-bodies	HLA-DPB2
cg19058585	chr2	112944983	DMR-gene-bodies	FBLN7
cg17876595	chr17	60447682	DMR-gene-bodies	EFCAB3
cg27627246	chr2	200199653	DMR-gene-bodies	SATB2
cg05850716	chr14	79220477	DMR-gene-bodies	NRXN3
cg26658509	chr11	3225550	DMS	-
cg08020574	chr16	89557182	DMR-promoters	ANKRD11
cg00332421	chr9	138590995	DMR-gene-bodies	SOHLH1
cg17002428	chr1	3778271	DMR-gene-bodies	DFFB
cg20130751	chr12	57881856	DMR-gene-bodies	MARS
cg21269738	chr12	2356703	DMS	CACNA1C
cg14413904	chr10	62423377	DMS	-
cg03466780	chr9	140247365	DMR-gene-bodies	EXD3
cg00374717	chr17	66303145	DMR-gene-bodies	ARSG
cg22015030	chr1	54411349	DMR-promoters	LRRC42;HSPB11
cg14923652	chr18	12277384	DMR-gene-bodies	CIDEA
