# Supplementary material for: Epigenetic analysis of Paget’s disease of bone identifies differentially methylated loci that predict disease status
Source: eLife. 2021 Apr 30;10:e65715. doi: 10.7554/eLife.65715 (PMC8184208; doi:10.7554/eLife.65715)
Supplement: Supplementary file 6. [file elife-65715-supp6.xlsx]

## Sheet: blood-bone correlation
Type	Gene Name	CpG Name	correlation (r2)	FDR adj.pvalue
DMS	PENK	cg16419235	0.856651	0.0102371
DMS	ZIC1	cg12965599	0.76934	0.0362204
DMS	ZIC1	cg07291439	0.792228	0.0272252
DMS	ZIC1	cg09241332	0.839611	0.0135956
DMS	ZIC1	cg14741939	0.781614	0.0312064
DMS	SPATA18	cg21068090	0.826242	0.0168277
DMS	SPATA18	cg03940064	0.826577	0.0167647
DMS	SPATA18	cg04868167	0.772826	0.0347971
DMS	HS6ST3	cg00914125	0.784152	0.0302052
DMS	LBX1	cg08174373	0.812807	0.0205591
DMS	LBX1	cg17283857	0.864532	0.00877446
DMS	NKX6-2	cg04436469	0.838066	0.0139618
DMS	PKN2/PKN2-AS1	cg01077609	0.890597	0.00507013
DMS	ARHGEF10	cg24804488	0.84256	0.012968
DMS	ARHGEF10	cg26972408	0.819227	0.0187583
DMS	ARHGEF10	cg13557947	0.754916	0.042869
DMR-Island	LTB	cg10196103	0.778827	0.032346
DMR-Island	SKIV2L	cg10404142	0.753617	0.0435048
DMR-Island	SKIV2L	cg17319109	0.885856	0.00565288
DMR-Island	SKIV2L	cg24850577	0.849447	0.0115922
DMR-Island	SKIV2L	cg18014138	0.864068	0.00885161
DMR-Island	SKIV2L	cg04710641	0.913359	0.00283408
DMR-Island	SKIV2L	cg14178705	0.844682	0.012537
DMR-Island	EBF3	cg15332174	0.778655	0.0324179
DMR-Island	EBF3	cg13638229	0.884755	0.0057875
DMR-Island	EBF3	cg17726092	0.877116	0.00684522
DMR-Island	EBF3	cg26229752	0.922272	0.00217459
DMR-Island	EBF3	cg20038116	0.778231	0.0325684
DMR-Island	EBF3	cg25386707	0.760117	0.0404197
DMR-Island	EBF3	cg15491701	0.832798	0.0152184
DMR-Island	CCND1	cg20094452	0.786475	0.0293097
DMR-Gene body	SDCCAG8	cg25820491	0.875449	0.00706394
DMR-Gene body	SDCCAG8	cg20276962	0.958993	0.00039418
DMR-Gene body	CACNA1B	cg20669572	0.836074	0.0144374
DMR-Gene body	CACNA1B	cg02698013	0.757845	0.0414429
DMR-Gene body	CACNA1B	cg14241045	0.899654	0.00404685
DMR-Gene body	CACNA1B	cg07291037	0.904026	0.00363336
DMR-Gene body	CACNA1B	cg13405678	0.761046	0.0399511
DMR-Gene body	CACNA1B	cg10506615	0.938595	0.00118446
DMR-Gene body	CACNA1B	cg14022794	0.911338	0.0030011
