# Supplementary material for: Epigenetic analysis of Paget’s disease of bone identifies differentially methylated loci that predict disease status
Source: eLife. 2021 Apr 30;10:e65715. doi: 10.7554/eLife.65715 (PMC8184208; doi:10.7554/eLife.65715)
Supplement: Supplementary file 7. — Highlighted in bold are the 8CpGs belonging to the best subset of sites (a subset of sites best explanatory of PDB). [file elife-65715-supp7.xlsx]

## Sheet: eQTM
Site	Chr	Position	Group	Gene	P-Value	FDR
cg14031054	1	164681652	DMR_gene_bodies	PBX1	6.1e-06	0.0018326
cg01075305	1	1152914	DMR_gene_bodies	TNFRSF18	1.2e-22	0
cg15605235	1	45189743	DMR_gene_bodies	C1orf228	3.8e-43	0
cg20300514	1	2120985	DMR_gene_bodies	C1orf86	2.93e-72	0
cg16068833	1	26644515	DMR_gene_bodies	CD52	0.0001344	0.0256967
cg06358191	1	1227138	DMR_gene_bodies	SCNN1D	5.37e-12	0
cg20978193	1	1227307	DMR_gene_bodies	SCNN1D	1.72e-20	0
cg25903497	2	219157103	DMR_gene_bodies	TMBIM1	3.51e-08	9.69e-06
cg18357696	2	219157111	DMR_gene_bodies	TMBIM1	4.09e-08	9.59e-06
cg04885775	3	114035416	DMR_promoters	TIGIT	4e-14	0
cg15906260	3	186505240	DMR_promoters	RFC4	6.39e-05	0.013844
cg04408595	3	71802608	DMR_gene_bodies	EIF4E3	0.0001553	0.0291158
cg21179654	3	114057297	DMR_gene_bodies	TIGIT	1.16e-10	0
cg25151919	3	44754333	DMR_gene_bodies	ZNF502	1.08e-05	0.00293216
cg22576236	4	1166933	DMR_gene_bodies	SPON2	1.84e-05	0.00477847
cg19933595	4	146857013	DMR_gene_bodies	ZNF827	3.28e-15	0
cg10477653	6	31941629	DMR_gene_bodies; Best subset	PRRT1	1.1e-05	0.00299375
cg13979602	6	31127004	DMR_gene_bodies; Best subset	TCF19	3.48e-12	0
cg21719344	6	30647128	DMS	LINC00243	2.99e-19	0
cg24153763	6	42928144	DMR_promoters	PEX6	7.3e-06	0.00211951
cg04219977	6	31506768	DMR_gene_bodies	HCP5	0.0001639	0.0305517
cg24876187	6	31126871	DMR_gene_bodies	TCF19	2.71e-10	0
cg01190171	6	31126373	DMR_gene_bodies	TCF19	3.16e-23	0
cg21863888	6	31127173	DMR_gene_bodies	TCF19	7.08e-23	0
cg17043247	6	33083989	DMR_gene_bodies	HLA-DPB2	1.73e-10	0
cg24185832	6	33084888	DMR_gene_bodies	HLA-DPB1	2.11e-11	0
cg23640002	6	33084933	DMR_gene_bodies	HLA-DOA	2.39e-10	0
cg26724726	6	31549853	DMR_gene_bodies	TNF	1.06e-05	0.00288946
cg06791592	6	32823292	DMR_gene_bodies	PSMB9	1.04e-67	0
cg10817441	6	32823728	DMR_gene_bodies	PSMB9	5.59e-50	0
cg13873889	6	31607340	DMR_gene_bodies	LY6G5C	1.15e-09	0
cg02053920	6	31093846	DMR_gene_bodies	HLA-C	1.74e-06	0.000544
cg00575744	6	32908642	DMR_gene_bodies	HLA-DPB1	0.0001062	0.0213285
cg05239791	6	31707956	DMR_gene_bodies	PRRC2A	7.74e-05	0.016364
cg18810691	7	151130479	DMS	WDR86	7.87e-07	0.000232
cg13879047	7	50774217	DMR_promoters	GRB10	1.53e-06	0.000485
cg10964367	8	1771973	DMS	ARHGEF10	3.86e-09	0
cg11737172	8	1923052	DMS	ARHGEF10	0.0002788	0.0466212
cg23221723	8	22963367	DMR_gene_bodies	TNFRSF10B	1.48e-06	0.000479
cg26878949	9	98279753	DMR_promoters	PTCH1	1.24e-25	0
cg21174903	9	140147188	DMR_gene_bodies	TOR4A	5.97e-11	0
cg03466780	9	140247365	DMR_gene_bodies; Best subset	EXD3	2.81e-13	0
cg14413904	10	62423377	DMS; Best subset	ANK3	1.42e-08	0
cg27434149	10	62332846	DMS	ANK3	1.6e-05	0.00425106
cg18561930	10	101769283	DMR_gene_bodies	DNMBP	4.53e-08	9.54e-06
cg22911054	11	68603379	DMR_gene_bodies	CPT1A	6.5e-06	0.00192034
cg12699648	13	24758155	DMR_gene_bodies	SPATA13	4.72e-08	9.52e-06
cg25643223	13	24787195	DMR_gene_bodies	SPATA13	4.75e-09	0
cg20033652	14	51290662	DMR_promoters	NIN	2.11e-12	0
cg03048432	14	51290751	DMR_promoters	NIN	1.44e-07	6.19e-05
cg07405255	16	354052	DMR_gene_bodies	AXIN1	9.25e-05	0.0189337
cg10045909	16	31075842	DMR_gene_bodies	STX4	5.02e-06	0.00154885
cg15438211	17	79967022	DMR_gene_bodies	ASPSCR1	0.0002273	0.039335
cg00758533	17	656901	DMR_islands; DMR_gene_bodies; DMR_promoters; Best subset	GEMIN4	4.13e-07	0.000114
cg12899157	18	3452302	DMR_promoters	TGIF1	7.24e-05	0.0154558
cg24998981	18	77441810	DMR_gene_bodies; Best subset	CTDP1	8.05e-05	0.016914
cg19866478	19	52801051	DMS; DMR_gene_bodies	ZNF880	4.35e-11	0
cg01046104	19	58095588	DMS	ZNF154	7.62e-27	0
cg00505277	19	58521176	DMS	ZNF418	1.58e-13	0
cg08884571	19	45901453	DMS	PPP1R13L	2.91e-34	0
cg02653557	19	58095424	DMS	ZNF154	8.67e-08	9.14e-06
cg02344833	19	58545285	DMS	ZNF418	6.28e-09	0
cg10585486	19	41304133	DMR_promoters	LTBP4	1.1e-05	0.00299412
cg25982880	19	4916593	DMR_gene_bodies	ARRDC5	6.13e-09	0
cg10000139	19	3805860	DMR_gene_bodies	MATK	1.77e-06	0.000558
cg08417595	19	3811002	DMR_gene_bodies	MATK	5.02e-09	0
cg22840076	19	41782156	DMR_gene_bodies	HNRNPUL1	2.22e-07	8.53e-05
cg10286380	19	51171847	DMR_gene_bodies	CLEC11A	0.00011	0.0219078
cg02631082	19	51192440	DMR_gene_bodies	CLEC11A	0.000112	0.022216
cg17700915	19	52840042	DMR_gene_bodies	ZNF528	1.4e-06	0.000481
cg01263077	19	17316300	DMR_gene_bodies; Best subset	NR2F6	7.39e-05	0.0157066
cg14928764	20	23064608	DMS; DMR_gene_bodies; Best subset	CD93	1.39e-17	0
cg21291385	21	35448215	DMR_gene_bodies	MRPS6	7.78e-06	0.00228945
